# Supplementary material for: Carbonaceous aerosol source apportionment using the Aethalometer model – evaluation by radiocarbon and levoglucosan analysis at a rural background site in southern Sweden
Source: Copernicus journal article supplement (doi:10.5194/acp-17-4265-2017), 2017-03-29
Supplement: Supplementary file 2 [file acp-17-4265-2017-supplement.zip]

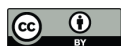

*Supplement of*

## **Carbonaceous aerosol source apportionment using the Aethalometer model – evaluation by radiocarbon and levoglucosan analysis at a rural background site in southern Sweden**

**Johan Martinsson et al.**

*Correspondence to:* Johan Martinsson ([johan.martinsson@nuclear.lu.se](mailto:johan.martinsson@nuclear.lu.se))

- [acp-17-4265-2017-supplement-title-page.pdf](#)
- [Martinsson et al. 2016\\_SI.pdf](#)
- [Martinsson et al. 2016\\_data.xlsx](#)

The copyright of individual parts of the supplement might differ from the CC-BY 3.0 licence.
